# Supplementary material
Source: PubMed Central journal article supplement (PMC2268801)

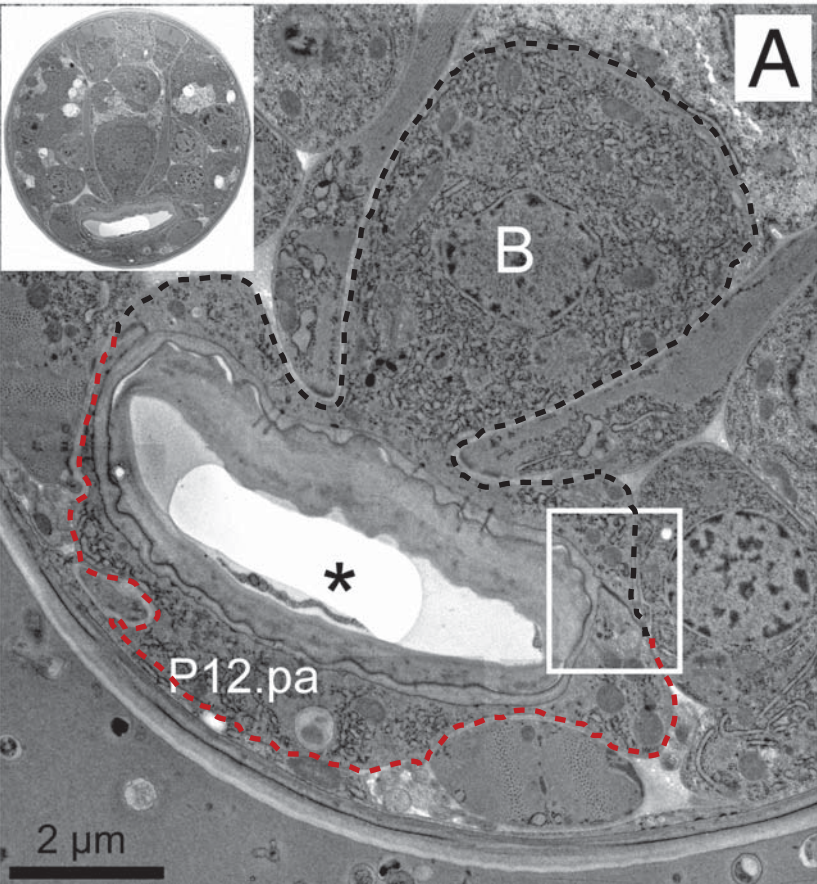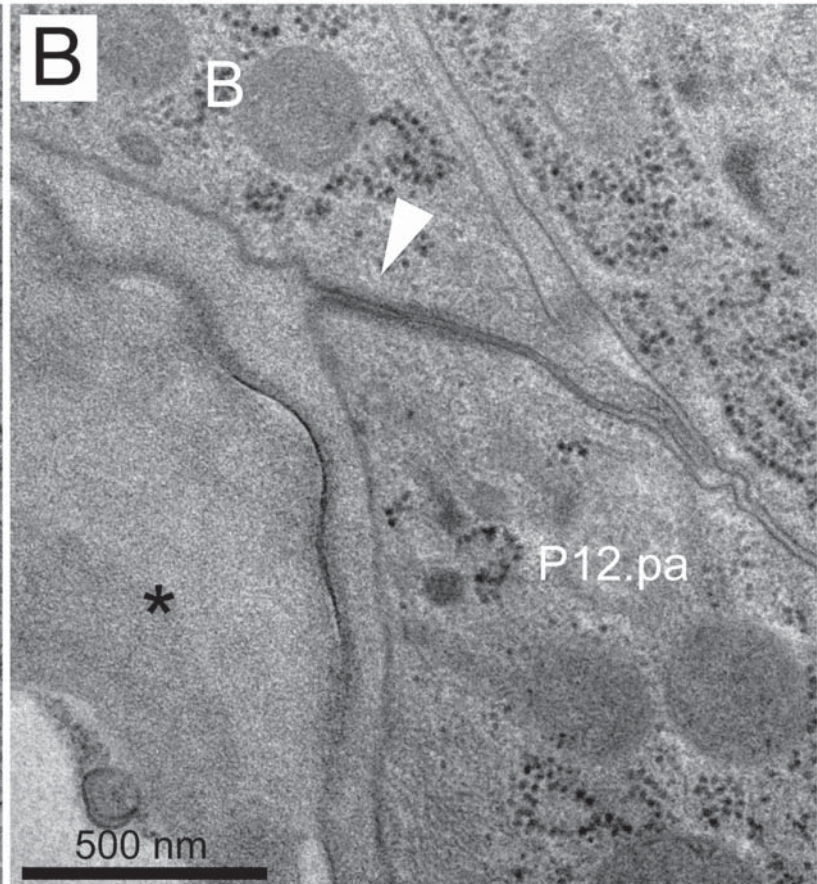

Supplement: pnas_0712159105_1.pdf [file pnas_0712159105_1.pdf]

**A**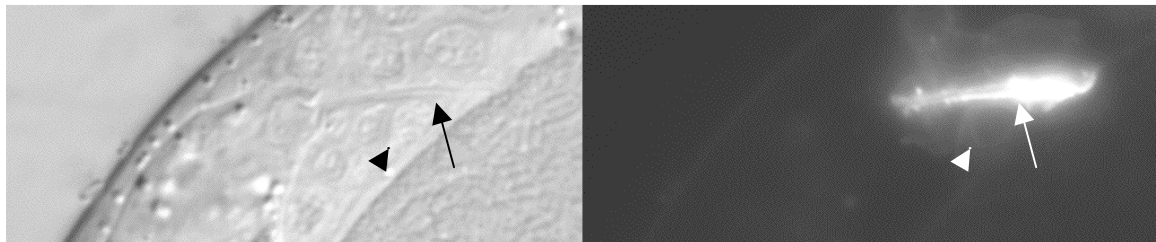**B**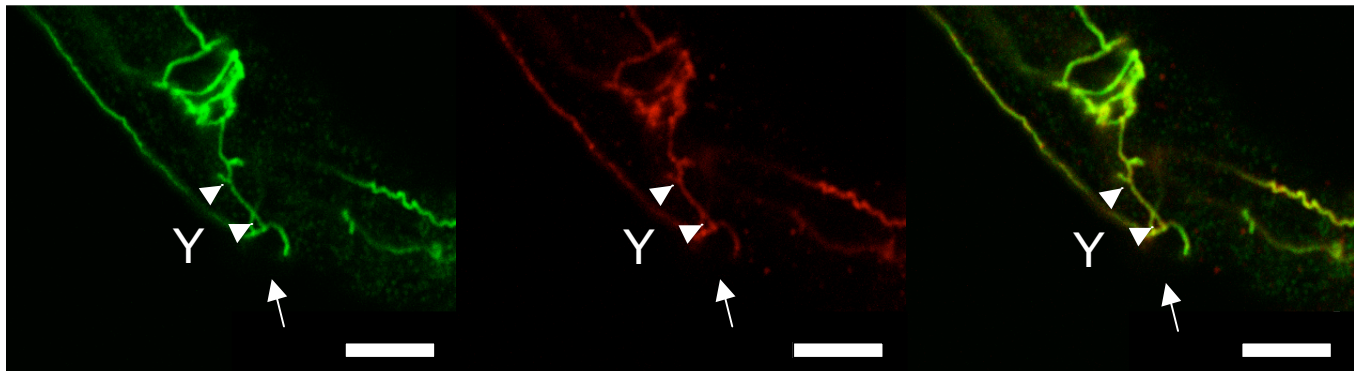**C**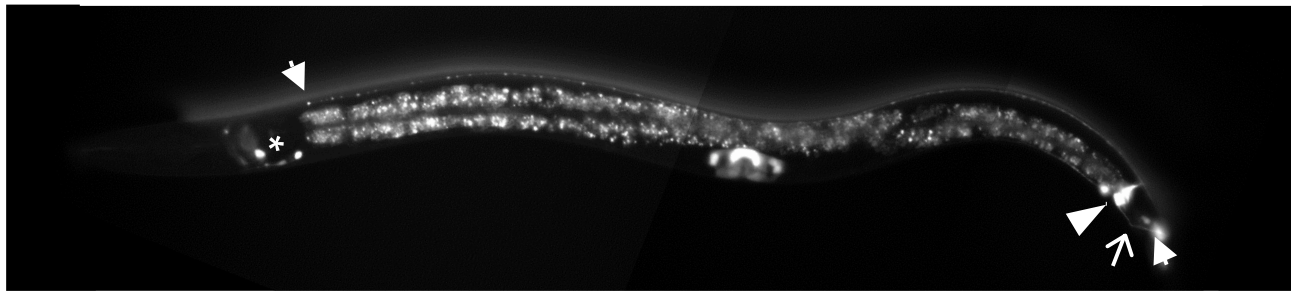

Supplement: pnas_0712159105_2.pdf [file pnas_0712159105_2.pdf]

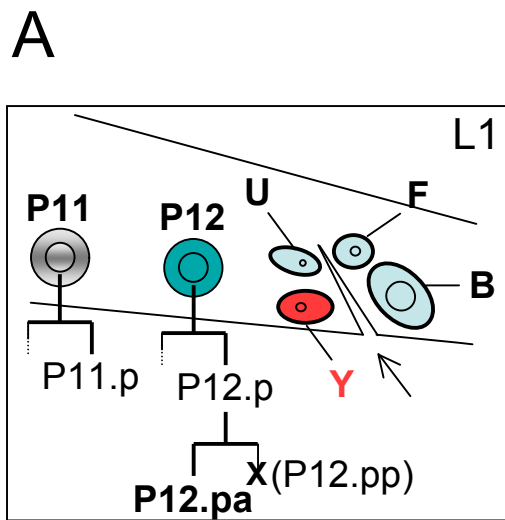

**B**

**L1**

**L3**

WT

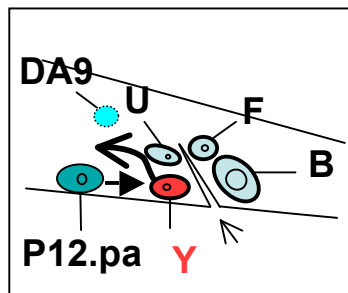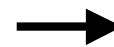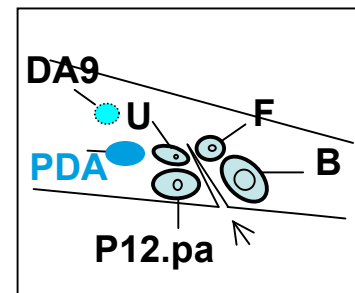

*bar-1(0)*

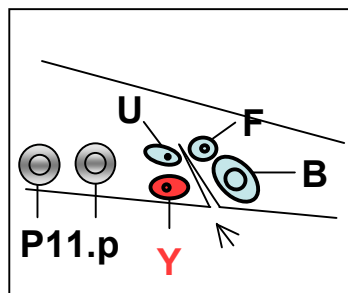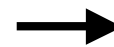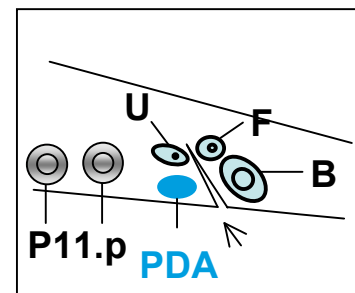

*egl-5(0)*

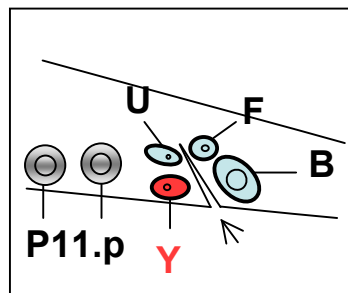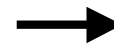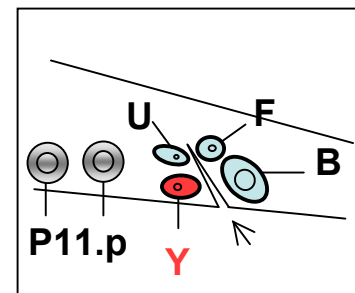

*sem-4(0)*

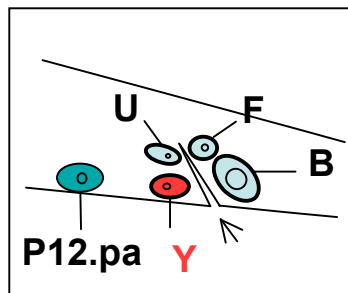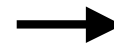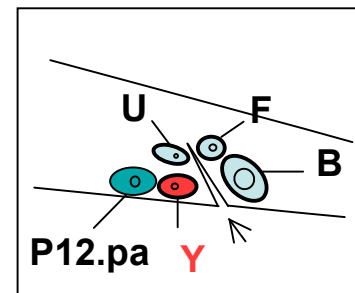

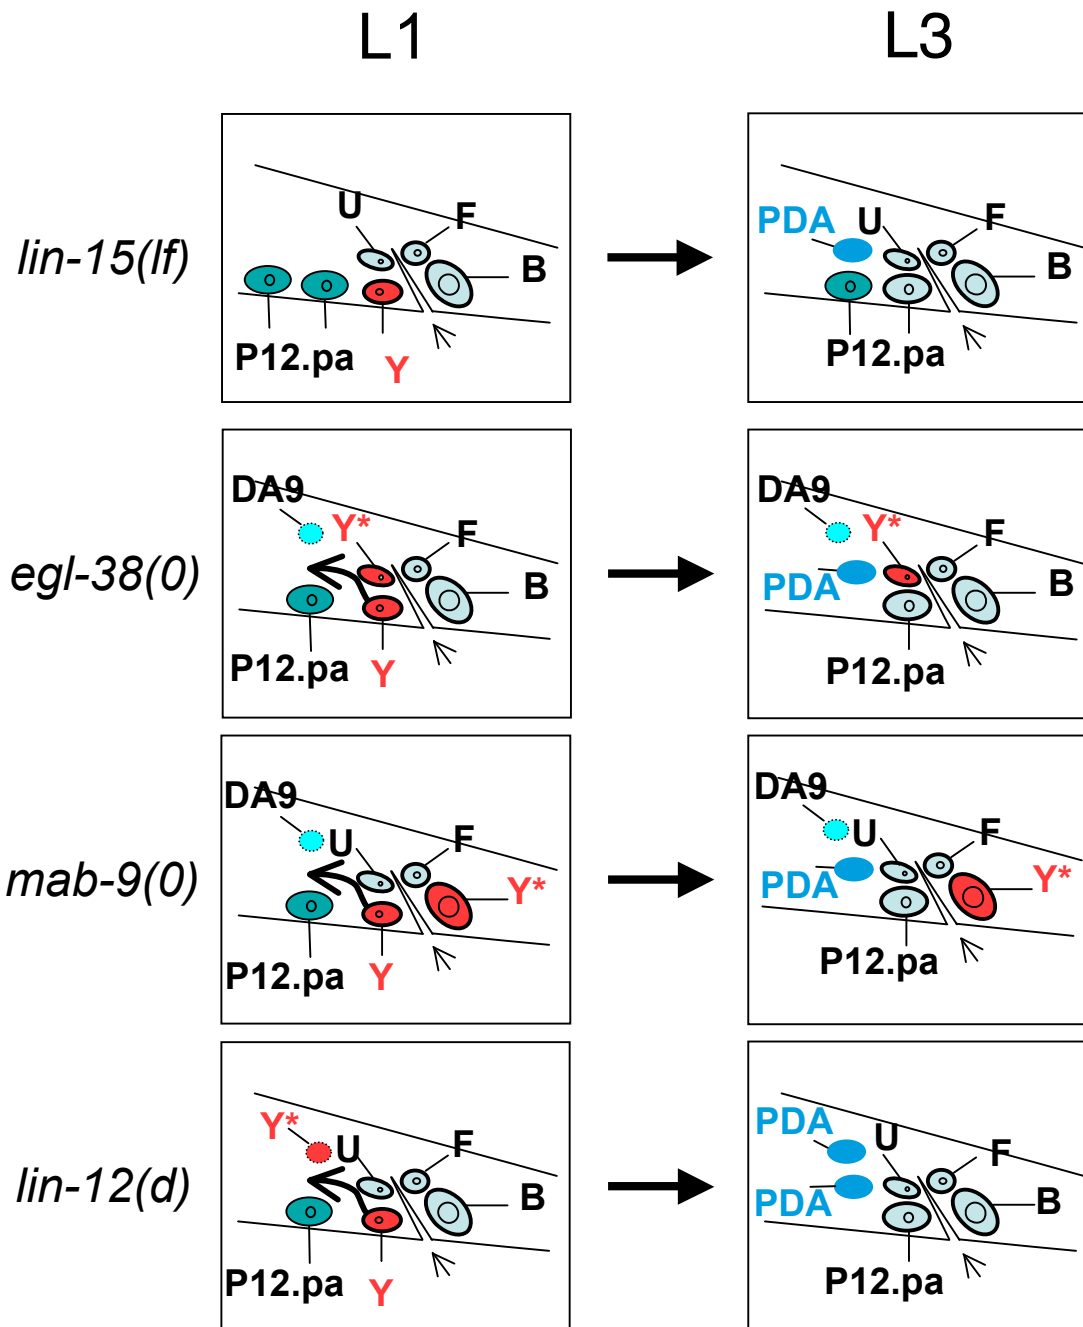

Supplement: pnas_0712159105_3.pdf [file pnas_0712159105_3.pdf]
